# Supplementary material for: Four novel anti-adhesive activity peptides against Helicobacter pylori derived from rice bran protein: release, identification and anti-adhesive mechanisms elucidation
Source: Royal Society of Chemistry journal article supplement (doi:10.1039/d4fo01734j), 2024-01-01
Supplement: d4fo01734j1.pdf [file d4fo01734j1.pdf]

**Supplementary Table 1 Identification of anti-adhesive activity peptides with potential binding ability to *H. pylori* by Nano LC-MS/MS**

| No. | Peptide Sequences | Length | Score | Mass    | Uniprot number | Start position | End position | Intensity  |
|-----|-------------------|--------|-------|---------|----------------|----------------|--------------|------------|
| 1   | FNPDLL            | 6      | 317.7 | 718.377 | A0A0P0VIM4     | 231            | 236          | 5800300000 |
| 2   | AFEPVRTV          | 8      | 329.8 | 932.520 | Q09151         | 52             | 59           | 4914800000 |
| 3   | VVNFGNL           | 7      | 280.4 | 762.415 | Q84Q83         | 344            | 350          | 3203800000 |
| 4   | IPIINI            | 6      | 319.4 | 682.450 | Q6H4P7         | 435            | 440          | 3198300000 |
| 5   | SFVPVIR           | 7      | 275.6 | 817.493 | Q69QZ0         | 48             | 54           | 2035100000 |
| 6   | ISSGVARQL         | 9      | 269.8 | 930.537 | Q09151         | 242            | 250          | 1959100000 |
| 7   | GLTGTIPGSL        | 10     | 229.0 | 915.515 | Q69JN6         | 701            | 710          | 1250100000 |
| 8   | LIGQF             | 5      | 244.9 | 577.334 | Q6ZCV7         | 192            | 196          | 1240200000 |
| 9   | VVIL              | 4      | 123.9 | 443.323 | Q7G065         | 504            | 507          | 1107700000 |
| 10  | IIPQHYA           | 7      | 150.9 | 841.457 | P14323         | 405            | 411          | 1069300000 |
| 11  | IGMF              | 4      | 72.9  | 483.227 | P37833         | 352            | 355          | 1008500000 |
| 12  | DEPA              | 4      | 18.9  | 473.188 | Q7G065         | 176            | 179          | 981650000  |
| 13  | VLAFL             | 5      | 330.8 | 562.360 | Q6F2Z1         | 375            | 379          | 895400000  |
| 14  | LSFRL             | 5      | 356.4 | 635.388 | P0C434         | 133            | 137          | 846060000  |
| 15  | VLPGVVGFK         | 9      | 233.9 | 915.566 | Q6YZX6         | 242            | 250          | 832070000  |
| 16  | VGPVSYL           | 7      | 213.9 | 734.408 | Q2QLY5         | 156            | 162          | 767140000  |
| 17  | IPQHY             | 5      | 292.1 | 657.336 | P14323         | 406            | 410          | 734820000  |
| 18  | TILF              | 4      | 119.6 | 493.302 | Q67IX6         | 489            | 492          | 730020000  |
| 19  | ISSH              | 4      | 20.3  | 443.225 | Q0DCI1         | 360            | 363          | 725670000  |
| 20  | KDLLF             | 5      | 265.1 | 677.387 | A0A0P0XYN4     | 145            | 149          | 703000000  |
| 21  | KDY               | 3      | 84.9  | 425.203 | P28752         | 430            | 432          | 682220000  |
| 22  | KGVII             | 5      | 179.3 | 571.381 | Q75GX9         | 272            | 276          | 672820000  |

|    |           |   |       |         |            |     |     |           |
|----|-----------|---|-------|---------|------------|-----|-----|-----------|
| 23 | SNTPGMVY  | 8 | 313.2 | 868.387 | P14614     | 99  | 106 | 660400000 |
| 24 | LAPRNPGSF | 9 | 361.2 | 958.511 | Q69P84     | 17  | 25  | 583080000 |
| 25 | KIIPH     | 5 | 122.8 | 649.403 | Q5VND6     | 293 | 297 | 559270000 |
| 26 | GGVCYW    | 6 | 176.9 | 741.303 | Q01882     | 150 | 155 | 538740000 |
| 27 | LEQRPRF   | 7 | 380.0 | 945.527 | Q75GX9     | 315 | 321 | 538510000 |
| 28 | IAFKTNPNS | 9 | 312.5 | 991.521 | P07730     | 428 | 436 | 499760000 |
| 29 | SQKFPIL   | 7 | 399.7 | 832.493 | P14323     | 338 | 344 | 495470000 |
| 30 | SFYL      | 4 | 268.4 | 529.266 | Q5QM84     | 679 | 682 | 490480000 |
| 31 | EIPRS     | 5 | 225.2 | 601.330 | Q0JA29     | 305 | 309 | 483950000 |
| 32 | EVRMRF    | 6 | 228.1 | 837.440 | Q10P60     | 143 | 148 | 482360000 |
| 33 | LDVGLIR   | 7 | 388.0 | 785.488 | Q0JGY1     | 146 | 152 | 479830000 |
| 34 | PVLWGVPKG | 9 | 297.0 | 952.562 | A0A0P0W7K6 | 53  | 61  | 468220000 |
| 35 | RITY      | 4 | 51.7  | 552.314 | Q09151     | 335 | 338 | 464220000 |
| 36 | VTLF      | 4 | 303.6 | 479.286 | B7ECS8     | 156 | 159 | 448600000 |
| 37 | VLILLLL   | 7 | 74.4  | 796.591 | Q69JN6     | 839 | 845 | 427790000 |
| 38 | LGLPI     | 5 | 196.1 | 512.344 | Q0DEC8     | 440 | 444 | 427100000 |
| 39 | NAPLAHL   | 7 | 227.5 | 735.415 | Q0DEV5     | 464 | 470 | 409830000 |
| 40 | LVGH      | 4 | 7.3   | 425.251 | Q6YW46     | 151 | 154 | 394900000 |
| 41 | LIIPQHY   | 7 | 194.9 | 883.504 | P14323     | 404 | 410 | 394220000 |
| 42 | SSLL      | 5 | 49.1  | 506.282 | Q2R2D5     | 235 | 239 | 367210000 |
| 43 | NVDLNLY   | 7 | 364.5 | 850.431 | Q653V7     | 209 | 215 | 364390000 |
| 44 | KADFL     | 5 | 229.6 | 635.340 | Q6ZFZ4     | 888 | 892 | 356000000 |
| 45 | SIYSR     | 5 | 141.2 | 625.330 | Q2QVC1     | 254 | 258 | 354560000 |
| 46 | AAVT      | 4 | 14.2  | 403.219 | P37833     | 401 | 404 | 350380000 |
| 47 | AILTPF    | 6 | 323.5 | 661.392 | Q6T725     | 356 | 361 | 348150000 |

|    |           |   |       |         |            |      |      |           |
|----|-----------|---|-------|---------|------------|------|------|-----------|
| 48 | IVIF      | 4 | 232.3 | 491.323 | Q5QM84     | 460  | 463  | 343890000 |
| 49 | NVLLG     | 5 | 144.2 | 515.319 | Q0DEV5     | 579  | 583  | 342020000 |
| 50 | IPRS      | 4 | 256.6 | 472.288 | Q69JN6     | 542  | 545  | 334270000 |
| 51 | VIAF      | 4 | 195.0 | 449.276 | Q948T6     | 132  | 135  | 323140000 |
| 52 | PRAF      | 4 | 134.5 | 490.277 | Q852L2     | 103  | 106  | 316130000 |
| 53 | VYIIQGRG  | 8 | 306.8 | 905.520 | P14323     | 105  | 112  | 314570000 |
| 54 | SFTDIY    | 6 | 275.3 | 745.340 | Q10PD0     | 102  | 107  | 314060000 |
| 55 | FVLL      | 4 | 167.8 | 533.333 | Q5QM84     | 463  | 466  | 308450000 |
| 56 | FMMPL     | 5 | 293.1 | 638.304 | Q7G065     | 3    | 7    | 306030000 |
| 57 | GLVLPMY   | 7 | 314.5 | 808.427 | A1YQH2     | 96   | 102  | 299820000 |
| 58 | VLIPH     | 5 | 341.8 | 620.377 | Q7XAM6     | 331  | 335  | 286960000 |
| 59 | MMPL      | 4 | 199.8 | 533.246 | Q7G065     | 4    | 7    | 282500000 |
| 60 | AFTPRFQ   | 7 | 347.6 | 866.452 | P14323     | 476  | 482  | 278940000 |
| 61 | FEPIRS    | 6 | 317.5 | 748.399 | P07730     | 54   | 59   | 278180000 |
| 62 | HIAGKSSIF | 9 | 357.9 | 959.531 | P07730     | 440  | 448  | 274250000 |
| 63 | SGTF      | 4 | 98.2  | 453.198 | Q0J006     | 152  | 155  | 271810000 |
| 64 | ILGAGPI   | 7 | 161.7 | 640.403 | B9EXM2     | 82   | 88   | 268940000 |
| 65 | DYE       | 3 | 30.7  | 426.151 | P15280     | 214  | 216  | 268850000 |
| 66 | KGLPI     | 5 | 142.7 | 569.366 | Q5CCK3     | 490  | 494  | 266550000 |
| 67 | YVGP      | 4 | 80.2  | 435.224 | Q6YYV1     | 199  | 202  | 260650000 |
| 68 | IMIPI     | 5 | 95.0  | 586.363 | Q0DS44     | 26   | 30   | 259070000 |
| 69 | SREEAQRL  | 8 | 503.5 | 988.517 | P07730     | 463  | 470  | 247990000 |
| 70 | EFGAFTP   | 7 | 335.2 | 768.356 | P07730     | 477  | 483  | 246940000 |
| 71 | LGVP      | 4 | 82.8  | 385.245 | A0A0P0WBK1 | 1253 | 1256 | 244960000 |
| 72 | DFEGIFR   | 7 | 304.6 | 883.431 | Q6AVA8     | 676  | 682  | 244420000 |

|    |           |   |       |         |        |      |      |           |
|----|-----------|---|-------|---------|--------|------|------|-----------|
| 73 | ILPVL     | 5 | 242.1 | 554.391 | Q7X7S8 | 65   | 69   | 243420000 |
| 74 | VLT       | 3 | 44.4  | 374.229 | Q0DEV5 | 318  | 320  | 234010000 |
| 75 | VVMDIPHA  | 8 | 226.1 | 881.455 | Q6AVA8 | 218  | 225  | 228130000 |
| 76 | IJET      | 4 | 84.7  | 475.276 | Q6ZYZ4 | 638  | 641  | 225510000 |
| 77 | IKSQ      | 4 | 113.8 | 475.288 | Q0JIR6 | 214  | 217  | 224710000 |
| 78 | KARDFLPF  | 8 | 314.7 | 993.552 | Q6H547 | 573  | 580  | 221120000 |
| 79 | QLSPVL    | 6 | 135.5 | 656.398 | Q10PD0 | 132  | 137  | 214190000 |
| 80 | PVLLL     | 5 | 52.7  | 596.402 | Q6Z4E4 | 422  | 426  | 204090000 |
| 81 | IISGPVVAM | 9 | 267.1 | 886.507 | Q07661 | 65   | 73   | 201130000 |
| 82 | ALKIF     | 5 | 57.3  | 633.397 | Q5QM84 | 505  | 509  | 201120000 |
| 83 | VGSAG     | 5 | 73.2  | 390.198 | Q5Z7H5 | 658  | 662  | 198730000 |
| 84 | FEVPTGWK  | 8 | 368.4 | 963.493 | Q33AE4 | 396  | 403  | 198240000 |
| 85 | KFGIN     | 5 | 197.0 | 620.340 | Q01401 | 122  | 126  | 194300000 |
| 86 | DIL       | 3 | 68.8  | 402.224 | P30298 | 66   | 68   | 192350000 |
| 87 | IFLSA     | 5 | 199.2 | 550.324 | Q69TY5 | 505  | 509  | 189900000 |
| 88 | HLAGKNSVF | 9 | 506.8 | 972.526 | P14323 | 436  | 444  | 189420000 |
| 89 | PTLF      | 4 | 154.9 | 477.271 | Q10RX7 | 1346 | 1349 | 186070000 |
| 90 | AYGF      | 4 | 57.5  | 457.208 | Q2QV45 | 237  | 240  | 185510000 |
| 91 | KPKL      | 4 | 58.2  | 485.345 | Q5VND6 | 356  | 359  | 184280000 |
| 92 | FFDV      | 4 | 162.4 | 527.250 | P07730 | 69   | 72   | 183600000 |
| 93 | FVGA      | 4 | 97.7  | 393.213 | Q0DEV5 | 87   | 90   | 183480000 |
| 94 | NLQHTAGSF | 9 | 497.5 | 974.469 | Q7X7E6 | 140  | 148  | 183080000 |
| 95 | VFAGL     | 5 | 191.6 | 506.297 | P37833 | 6    | 10   | 177780000 |
| 96 | FAPKLPGGL | 9 | 317.8 | 899.535 | Q69TY5 | 414  | 422  | 176120000 |
| 97 | SMPMPL    | 6 | 131.1 | 691.315 | P29835 | 104  | 109  | 176020000 |

|     |           |   |       |         |            |      |      |           |
|-----|-----------|---|-------|---------|------------|------|------|-----------|
| 98  | FLVF      | 4 | 212.6 | 525.307 | P28752     | 135  | 138  | 175240000 |
| 99  | VLSPYNEF  | 8 | 313.2 | 968.472 | Q0DJ45     | 43   | 50   | 174900000 |
| 100 | GAPDVGHPM | 9 | 143.0 | 880.398 | Q0D7S0     | 109  | 117  | 171470000 |
| 101 | SEAPL     | 5 | 128.3 | 516.266 | Q10RX7     | 1241 | 1245 | 171300000 |
| 102 | FDLGGGTF  | 8 | 272.5 | 813.378 | Q6Z7B0     | 227  | 234  | 171210000 |
| 103 | LAHLIMA   | 7 | 286.1 | 768.444 | Q0DEV5     | 467  | 473  | 169810000 |
| 104 | PALLM     | 5 | 135.2 | 586.327 | Q0D8I9     | 613  | 617  | 169760000 |
| 105 | LLPTDVV   | 7 | 181.6 | 756.450 | Q6H6C7     | 266  | 272  | 166040000 |
| 106 | LLVWD     | 5 | 288.5 | 645.361 | P49027     | 43   | 47   | 165560000 |
| 107 | SFTALY    | 6 | 270.4 | 743.361 | A0A5S6R7U0 | 171  | 176  | 165060000 |
| 108 | VLF       | 3 | 146.5 | 378.239 | Q6AVA8     | 329  | 331  | 163060000 |
| 109 | GKTGFHMGR | 9 | 286.7 | 990.494 | Q0DEV5     | 516  | 524  | 154680000 |
| 110 | QLQPHLML  | 8 | 224.3 | 979.539 | P20698     | 32   | 39   | 153220000 |
| 111 | IFSGFGVE  | 8 | 310.0 | 855.425 | P14323     | 226  | 233  | 151700000 |
| 112 | IAGFF     | 5 | 238.9 | 554.297 | Q42456     | 152  | 156  | 150380000 |
| 113 | QLSHLIL   | 7 | 444.8 | 823.504 | A0A0P0Y1T7 | 1055 | 1061 | 149880000 |
| 114 | ELAT      | 4 | 49.1  | 433.229 | A0A0P0WBK1 | 1363 | 1366 | 149430000 |
| 115 | QSNLF     | 5 | 250.6 | 608.304 | A0A0P0X0A0 | 397  | 401  | 148690000 |
| 116 | LGGNL     | 5 | 91.5  | 473.272 | A0A0P0X0A0 | 268  | 272  | 142120000 |
| 117 | LDMF      | 4 | 290.5 | 525.238 | Q6AVA8     | 212  | 215  | 141200000 |
| 118 | FTHIDAL   | 7 | 280.4 | 816.425 | Q40680     | 58   | 64   | 139700000 |
| 119 | ATRVNLY   | 7 | 288.2 | 836.463 | P14323     | 351  | 357  | 139190000 |
| 120 | LAVL      | 4 | 160.9 | 415.292 | Q6AVA8     | 280  | 283  | 138590000 |
| 121 | LSFL      | 4 | 190.9 | 479.286 | Q6ZFZ4     | 714  | 717  | 138360000 |
| 122 | VVDWLAS   | 7 | 219.4 | 789.414 | Q2QV45     | 290  | 296  | 135550000 |

|     |           |   |       |         |            |      |      |           |
|-----|-----------|---|-------|---------|------------|------|------|-----------|
| 123 | IYLL      | 4 | 195.8 | 521.333 | B9G2A8     | 2217 | 2220 | 135300000 |
| 124 | IGGVCYW   | 7 | 168.6 | 854.387 | Q8H4M4     | 143  | 149  | 134960000 |
| 125 | VAAAT     | 5 | 61.8  | 432.245 | A0A0P0WBK1 | 2311 | 2315 | 134370000 |
| 126 | SIWKEADF  | 8 | 293.5 | 995.483 | Q0J8G4     | 199  | 206  | 134020000 |
| 127 | LLPHYSN   | 7 | 249.1 | 843.436 | Q09151     | 94   | 100  | 133920000 |
| 128 | VFDVI     | 5 | 245.7 | 592.334 | A0A0P0WR49 | 80   | 84   | 132380000 |
| 129 | FDVSI     | 5 | 84.0  | 580.298 | Q6Z7B0     | 234  | 238  | 131930000 |
| 130 | MLY       | 3 | 61.2  | 426.206 | Q01401     | 414  | 416  | 131560000 |
| 131 | PMPL      | 4 | 170.6 | 457.248 | P29835     | 106  | 109  | 130860000 |
| 132 | IDMGNPFL  | 8 | 320.5 | 906.439 | Q65XV6     | 19   | 26   | 128740000 |
| 133 | TGRERFQP  | 8 | 225.6 | 990.512 | P29835     | 57   | 64   | 128060000 |
| 134 | SATRVNLY  | 8 | 440.8 | 923.495 | P14323     | 350  | 357  | 127660000 |
| 135 | FPPF      | 4 | 55.8  | 557.276 | Q6EUS6     | 239  | 242  | 125800000 |
| 136 | GYTLPHAIL | 9 | 308.6 | 984.551 | Q75HX0     | 169  | 177  | 125750000 |
| 137 | EVFII     | 5 | 80.0  | 620.365 | Q8H8V7     | 499  | 503  | 124730000 |
| 138 | VLIAL     | 5 | 190.9 | 528.376 | Q0JA29     | 815  | 819  | 124700000 |
| 139 | ALLLF     | 5 | 275.6 | 576.376 | Q75HQ0     | 21   | 25   | 124220000 |
| 140 | VSEF      | 4 | 120.2 | 481.229 | C7J6G6     | 664  | 667  | 123730000 |
| 141 | LAHQ      | 4 | 14.7  | 510.267 | Q67IX6     | 122  | 125  | 123310000 |
| 142 | SYQDISVSA | 9 | 342.5 | 969.452 | Q09151     | 488  | 496  | 122280000 |
| 143 | VLLSPY    | 6 | 265.6 | 691.403 | B9FDT1     | 168  | 173  | 120920000 |
| 144 | ALEIF     | 5 | 193.1 | 592.334 | Q0DS44     | 10   | 14   | 120850000 |
| 145 | GFPTILF   | 7 | 225.0 | 794.445 | Q67IX6     | 486  | 492  | 120130000 |
| 146 | FDRAMQSL  | 8 | 268.5 | 983.462 | A0A0N7KFE7 | 64   | 71   | 119140000 |
| 147 | QDISVSA   | 7 | 395.3 | 719.357 | Q09151     | 490  | 496  | 118860000 |

|     |           |   |       |         |            |      |      |           |
|-----|-----------|---|-------|---------|------------|------|------|-----------|
| 148 | SVNEFL    | 6 | 191.3 | 708.356 | A3BXL8     | 713  | 718  | 118520000 |
| 149 | FVDVL     | 5 | 258.4 | 592.334 | Q5N725     | 89   | 93   | 117060000 |
| 150 | VVTFGPS   | 7 | 297.3 | 706.377 | O64937     | 265  | 271  | 116770000 |
| 151 | VFLMI     | 5 | 221.8 | 622.363 | A0A0P0WBK1 | 881  | 885  | 115760000 |
| 152 | MVDTTIL   | 7 | 208.1 | 792.417 | P15280     | 271  | 277  | 115570000 |
| 153 | NHMGGIY   | 8 | 173.9 | 890.419 | Q01882     | 99   | 106  | 114050000 |
| 154 | GVALF     | 5 | 307.6 | 506.297 | Q67U26     | 520  | 524  | 113590000 |
| 155 | SQAF      | 4 | 247.9 | 494.225 | Q6ZF85     | 420  | 423  | 113250000 |
| 156 | LSVF      | 4 | 268.6 | 465.271 | Q6ZFZ4     | 2149 | 2152 | 113160000 |
| 157 | ITPR      | 4 | 46.4  | 486.304 | Q43009     | 333  | 336  | 112800000 |
| 158 | AYLF      | 4 | 189.9 | 513.271 | Q6AVT2     | 332  | 335  | 111910000 |
| 159 | NFPDLI    | 6 | 112.6 | 718.377 | Q10RX7     | 579  | 584  | 111160000 |
| 160 | PTRFPQ    | 6 | 148.2 | 745.399 | Q8GU83     | 1154 | 1159 | 110880000 |
| 161 | SVFI      | 4 | 33.5  | 507.281 | B9G2A8     | 1164 | 1167 | 107330000 |
| 162 | KGGIF     | 5 | 329.6 | 563.319 | A0A0P0WF95 | 37   | 41   | 106430000 |
| 163 | SYIHVGPVL | 9 | 424.0 | 984.551 | A0A0N7KNU5 | 76   | 84   | 105520000 |
| 164 | LLPHYSNG  | 8 | 211.2 | 900.457 | Q09151     | 94   | 101  | 105450000 |
| 165 | LIGR      | 4 | 77.6  | 458.309 | Q6Z7B0     | 102  | 105  | 104600000 |
| 166 | PALLI     | 5 | 140.8 | 568.371 | Q0D8I9     | 33   | 37   | 103670000 |
| 167 | TLRF      | 4 | 27.3  | 536.319 | Q6YZX6     | 870  | 873  | 103110000 |
| 168 | GFILLL    | 6 | 129.4 | 717.455 | Q8GU83     | 763  | 768  | 102290000 |
| 169 | VSFLPDIL  | 8 | 218.3 | 903.519 | Q67UF5     | 301  | 308  | 101980000 |
| 170 | GIVIL     | 5 | 228.5 | 514.360 | A0A0P0WSV5 | 285  | 289  | 101190000 |
| 171 | GFSPISL   | 7 | 259.6 | 720.393 | Q7XHN4     | 127  | 133  | 100340000 |
| 172 | TFGF      | 4 | 13.5  | 471.224 | A0A0P0VIP0 | 274  | 277  | 99934000  |

|     |           |   |       |         |            |     |     |          |
|-----|-----------|---|-------|---------|------------|-----|-----|----------|
| 173 | SYSSIL    | 7 | 264.1 | 782.429 | D0TZF0     | 791 | 797 | 98929000 |
| 174 | DHLPSF    | 6 | 211.7 | 715.341 | A0A0P0WYY7 | 525 | 530 | 98837000 |
| 175 | PGYY      | 4 | 273.6 | 499.219 | A0A0P0W7K6 | 116 | 119 | 98199000 |
| 176 | IDHPSFLE  | 8 | 338.2 | 957.468 | Q0DEV5     | 165 | 172 | 97881000 |
| 177 | REWAPAAQ  | 8 | 233.1 | 928.464 | Q01401     | 135 | 142 | 97420000 |
| 178 | RVKEYLP   | 7 | 329.9 | 904.525 | P37833     | 67  | 73  | 96964000 |
| 179 | QILELY    | 6 | 285.7 | 778.435 | Q2QS11     | 201 | 206 | 96628000 |
| 180 | VGAEMAPW  | 8 | 212.4 | 876.392 | Q0DEV5     | 88  | 95  | 95945000 |
| 181 | FGARPVVLV | 9 | 238.2 | 957.588 | Q4U0D3     | 92  | 100 | 95091000 |
| 182 | VTLGA     | 5 | 29.8  | 460.277 | Q6I609     | 189 | 193 | 95030000 |
| 183 | IDPLL     | 5 | 66.8  | 570.350 | Q6ZF85     | 21  | 25  | 92558000 |
| 184 | FQCTGTF   | 7 | 337.2 | 860.361 | P14323     | 76  | 82  | 92292000 |
| 185 | YPGLSN    | 6 | 280.7 | 650.314 | P14323     | 486 | 491 | 92215000 |
| 186 | VTDIYNS   | 7 | 408.6 | 811.383 | Q09151     | 186 | 192 | 91943000 |
| 187 | SIVYITQ   | 7 | 400.7 | 823.456 | P07730     | 376 | 382 | 91411000 |
| 188 | SVIIF     | 5 | 208.8 | 620.365 | Q0DS44     | 20  | 24  | 90584000 |
| 189 | IILPQLF   | 7 | 147.5 | 843.534 | A0A0P0WYY7 | 286 | 292 | 90349000 |
| 190 | QDIARF    | 7 | 406.6 | 862.478 | A0A0P0W399 | 277 | 283 | 90035000 |
| 191 | FGPNVNPW  | 8 | 227.6 | 930.447 | P14614     | 27  | 34  | 88529000 |
| 192 | VPVHT     | 5 | 49.0  | 552.314 | Q6Z4N6     | 190 | 194 | 86354000 |
| 193 | VYFPYTE   | 7 | 124.4 | 918.424 | P30298     | 527 | 533 | 86032000 |
| 194 | VFGSVI    | 6 | 299.0 | 621.361 | Q69XA0     | 414 | 419 | 85246000 |
| 195 | SGPGI     | 5 | 108.4 | 472.240 | P0C540     | 366 | 370 | 85130000 |
| 196 | LLLPHY    | 6 | 242.2 | 797.456 | P07730     | 94  | 99  | 84939000 |
| 197 | SLDT      | 4 | 185.7 | 477.219 | Q01401     | 434 | 437 | 84757000 |



|     |            |    |       |         |            |      |      |          |
|-----|------------|----|-------|---------|------------|------|------|----------|
| 198 | PTDVL      | 5  | 333.9 | 544.298 | P07730     | 452  | 456  | 83410000 |
| 199 | FVFDVNNN   | 8  | 280.1 | 968.447 | Q6ESW6     | 183  | 190  | 83245000 |
| 200 | IFVAL      | 5  | 269.3 | 562.360 | Q0DJS1     | 597  | 601  | 83144000 |
| 201 | SLVPY      | 5  | 168.7 | 578.318 | Q10MT7     | 68   | 72   | 82758000 |
| 202 | GFPTIL     | 6  | 332.9 | 647.376 | Q67IX6     | 486  | 491  | 78171000 |
| 203 | AFNVPS     | 6  | 226.4 | 634.320 | Q0DJ45     | 123  | 128  | 77515000 |
| 204 | GVPF       | 4  | 137.2 | 419.229 | P49027     | 65   | 68   | 77048000 |
| 205 | MQYFPAT    | 7  | 174.4 | 857.386 | Q2R363     | 28   | 34   | 77038000 |
| 206 | ALATF      | 5  | 98.6  | 564.303 | Q10RX7     | 566  | 570  | 76959000 |
| 207 | KAILI      | 5  | 221.6 | 599.413 | Q6H501     | 505  | 509  | 76832000 |
| 208 | TVVIL      | 5  | 148.6 | 544.371 | Q0JKD0     | 1520 | 1524 | 76570000 |
| 209 | SPPV       | 4  | 61.6  | 441.234 | B9G2A8     | 1512 | 1515 | 76405000 |
| 210 | IAFIG      | 5  | 241.1 | 520.313 | Q0DEV5     | 403  | 407  | 74787000 |
| 211 | HFSPL      | 5  | 338.9 | 600.314 | A0A0P0W399 | 15   | 19   | 74614000 |
| 212 | IYHLPSPS   | 8  | 372.7 | 913.478 | Q6H4L2     | 337  | 344  | 74278000 |
| 213 | EVWDY      | 5  | 171.1 | 711.298 | Q6H4P7     | 637  | 641  | 74176000 |
| 214 | PRVF       | 4  | 89.5  | 518.309 | A7LFZ6     | 187  | 190  | 73658000 |
| 215 | LENPSFRP   | 8  | 315.1 | 959.495 | A0A0P0W7K6 | 409  | 416  | 73551000 |
| 216 | FSTEL      | 5  | 329.5 | 596.293 | P07730     | 231  | 235  | 73514000 |
| 217 | SFTSG      | 5  | 141.1 | 498.220 | Q6Z673     | 672  | 676  | 73501000 |
| 218 | VPAIVF     | 6  | 318.7 | 645.397 | Q5N725     | 259  | 264  | 72510000 |
| 219 | VAFL       | 4  | 235.7 | 449.276 | Q5QM84     | 217  | 220  | 72296000 |
| 220 | GGGAGTRLYP | 10 | 389.4 | 948.490 | P15280     | 90   | 99   | 71850000 |
| 221 | YGLPGIIG   | 8  | 253.7 | 789.451 | Q5W6W7     | 28   | 35   | 71486000 |
| 222 | SFFSAF     | 6  | 356.1 | 705.324 | Q852L2     | 193  | 198  | 71325000 |

|     |           |   |       |         |            |      |      |          |
|-----|-----------|---|-------|---------|------------|------|------|----------|
| 223 | LTVIF     | 5 | 302.0 | 592.371 | Q7XS44     | 295  | 299  | 71007000 |
| 224 | PSFHF     | 5 | 343.3 | 634.298 | A0A0P0W7K6 | 2    | 6    | 70831000 |
| 225 | SLLAPF    | 6 | 195.1 | 647.376 | Q6EPC5     | 347  | 352  | 70199000 |
| 226 | LWDSRL    | 6 | 261.1 | 789.425 | Q01401     | 373  | 378  | 69452000 |
| 227 | ITITL     | 5 | 319.9 | 560.365 | Q8W3F9     | 944  | 948  | 69401000 |
| 228 | IVVI      | 4 | 112.4 | 443.323 | Q6AVA8     | 556  | 559  | 69256000 |
| 229 | LFDKLF    | 6 | 334.5 | 782.445 | Q5VRX8     | 713  | 718  | 69166000 |
| 230 | VERE      | 4 | 257.9 | 532.273 | Q69TY5     | 1129 | 1132 | 68747000 |
| 231 | LAPLF     | 5 | 178.8 | 560.344 | Q6K508     | 17   | 21   | 68689000 |
| 232 | PITFPG    | 6 | 316.1 | 631.345 | Q7XTY1     | 169  | 174  | 68411000 |
| 233 | VIAL      | 4 | 113.0 | 415.292 | P07730     | 163  | 166  | 66491000 |
| 234 | GVGILGI   | 7 | 323.3 | 628.403 | Q6K215     | 81   | 87   | 66444000 |
| 235 | TLET      | 4 | 74.0  | 463.240 | Q69JN6     | 527  | 530  | 66360000 |
| 236 | FDYILTQ   | 7 | 350.1 | 899.451 | Q65XK0     | 514  | 520  | 66353000 |
| 237 | SGTLGDIWE | 9 | 231.8 | 977.458 | Q65XK0     | 162  | 170  | 66232000 |
| 238 | LYVDRL    | 6 | 244.4 | 778.446 | Q10PB3     | 123  | 128  | 66226000 |
| 239 | DAFLF     | 5 | 117.9 | 612.303 | A0A0P0WF95 | 586  | 590  | 66177000 |
| 240 | ETFCSI    | 6 | 208.6 | 756.323 | Q7XAM6     | 1084 | 1089 | 66035000 |
| 241 | QFGDLY    | 6 | 220.7 | 742.341 | Q0DJ45     | 105  | 110  | 65527000 |
| 242 | TAYR      | 4 | 112.1 | 552.278 | A0A0P0VUB4 | 93   | 96   | 65175000 |
| 243 | KIQVGVF   | 7 | 345.8 | 790.482 | Q6Z2Z4     | 214  | 220  | 65040000 |
| 244 | FDRLQA    | 6 | 299.3 | 749.394 | P14323     | 47   | 52   | 64508000 |
| 245 | FFLA      | 4 | 156.0 | 497.276 | Q09151     | 203  | 206  | 64212000 |
| 246 | QCSIF     | 5 | 333.4 | 654.292 | P29835     | 177  | 181  | 64171000 |
| 247 | PAIF      | 4 | 258.1 | 447.260 | Q69TY5     | 467  | 470  | 63786000 |

|     |           |   |       |         |            |      |      |          |
|-----|-----------|---|-------|---------|------------|------|------|----------|
| 248 | IGAGFGHFA | 9 | 261.9 | 876.436 | Q948T6     | 90   | 98   | 63052000 |
| 249 | GVTAT     | 5 | 67.2  | 448.240 | Q6YZX6     | 258  | 262  | 62762000 |
| 250 | EESMPMPL  | 8 | 279.1 | 933.406 | P29835     | 102  | 109  | 62761000 |
| 251 | QGSLLL    | 6 | 295.1 | 630.382 | Q852K0     | 431  | 436  | 62749000 |
| 252 | LLFIPN    | 6 | 309.9 | 716.434 | Q8HCP7     | 26   | 31   | 62511000 |
| 253 | LVEGPFL   | 7 | 270.3 | 774.440 | Q10LP5     | 62   | 68   | 61988000 |
| 254 | VFIL      | 5 | 223.2 | 604.407 | Q6F2Z1     | 279  | 283  | 61783000 |
| 255 | LLPGDL    | 6 | 234.2 | 627.371 | Q2QXM4     | 179  | 184  | 61370000 |
| 256 | KYSF      | 4 | 77.9  | 544.277 | Q6H501     | 35   | 38   | 61322000 |
| 257 | VFDYGNL   | 7 | 263.2 | 827.393 | Q0JKM8     | 508  | 514  | 61253000 |
| 258 | PHYSNGATL | 9 | 453.4 | 959.458 | Q09151     | 96   | 104  | 60891000 |
| 259 | NNETILVF  | 8 | 288.0 | 949.499 | Q2QV45     | 244  | 251  | 60878000 |
| 260 | NSQKFPIL  | 8 | 247.6 | 946.536 | P14323     | 337  | 344  | 60588000 |
| 261 | KGGFY     | 5 | 115.8 | 613.298 | Q6YYR2     | 75   | 79   | 60358000 |
| 262 | PIPSI     | 5 | 38.4  | 526.324 | I1Z695     | 297  | 301  | 60107000 |
| 263 | VLQIL     | 5 | 189.1 | 585.397 | Q2QS11     | 199  | 203  | 59749000 |
| 264 | FFDVD     | 5 | 207.7 | 642.277 | A0A0P0YCJ3 | 62   | 66   | 59601000 |
| 265 | IFRALPND  | 8 | 251.9 | 945.515 | P07728     | 447  | 454  | 59472000 |
| 266 | LTPW      | 4 | 156.4 | 516.282 | A0A0P0WGH1 | 941  | 944  | 58492000 |
| 267 | PVVGI     | 5 | 47.5  | 484.313 | B9G2A8     | 1954 | 1958 | 58444000 |
| 268 | SVGF      | 4 | 84.4  | 409.208 | A3BXL8     | 419  | 422  | 58441000 |
| 269 | GGRGL     | 5 | 68.7  | 459.267 | Q69TY5     | 1234 | 1238 | 58421000 |
| 270 | LDGISPFG  | 8 | 307.2 | 805.409 | Q10P60     | 82   | 89   | 58347000 |
| 271 | LEFPLNL   | 7 | 222.9 | 845.477 | A0A0P0WA63 | 42   | 48   | 58339000 |
| 272 | SFFDAN    | 6 | 270.4 | 700.294 | Q7G065     | 354  | 359  | 58228000 |

|     |          |   |       |         |        |      |      |          |
|-----|----------|---|-------|---------|--------|------|------|----------|
| 273 | GVGLIG   | 6 | 155.9 | 515.319 | Q5ZBN0 | 81   | 86   | 57119000 |
| 274 | SARSL    | 5 | 10.8  | 533.304 | Q0D8I9 | 1005 | 1009 | 56766000 |
| 275 | IGFSL    | 5 | 242.7 | 536.308 | P0DKG9 | 162  | 166  | 56746000 |
| 276 | SNSFDVFI | 8 | 288.9 | 970.452 | Q6ZHC3 | 461  | 468  | 56710000 |
| 277 | AFTPRFQQ | 8 | 255.7 | 994.511 | P14323 | 476  | 483  | 56533000 |
| 278 | LFLVL    | 5 | 98.5  | 604.407 | Q6K3R5 | 80   | 84   | 56420000 |
| 279 | SFGTN    | 5 | 100.7 | 525.230 | Q6AVA8 | 840  | 844  | 56073000 |
| 280 | IVLLQ    | 5 | 358.7 | 585.397 | Q8H3P9 | 37   | 41   | 56061000 |
| 281 | LVPVL    | 5 | 153.1 | 540.376 | Q0DEC8 | 283  | 287  | 55535000 |
| 282 | QDRFS    | 5 | 313.2 | 652.305 | C7J6N6 | 395  | 399  | 55481000 |
| 283 | LLVPRY   | 6 | 146.8 | 760.472 | P14323 | 93   | 98   | 55046000 |
| 284 | LGTIPMVF | 8 | 216.2 | 877.485 | Q43009 | 275  | 282  | 54944000 |
